# Supplementary material for: Arterial Remodeling in B-Type Natriuretic Peptide Knock-Out Females
Source: PubMed Central journal article supplement (PMC4861904; doi:10.1038/srep25623), 2016-05-10
Supplement: srep25623-s1.pdf [file srep25623-s1.pdf]

**Supplementary Information****“ARTERIAL REMODELING IN B-TYPE NATRIURETIC PEPTIDE KNOCK-OUT FEMALES”**

Short title: Vasoprotective role of BNP

Sara J. Holditch<sup>1</sup> Ph.D, Claire A. Schreiber<sup>1</sup> B.S, John C. Burnett<sup>2</sup> M.D, Yasuhiro Ikeda<sup>1</sup> Ph.D, D.V.M**Supplementary Table S1.** Quantitative Real Time PCR Primer List

| Gene Name                                | Gene Abbreviation | Species | Cat No.    | Primer Assay                               |
|------------------------------------------|-------------------|---------|------------|--------------------------------------------|
| Atrial Natriuretic Peptide               | Nppa              | Rat     | QT00366170 | Rn_RGD:3193_1_SG QuantiTect Primer Assay   |
| B-Type Natriuretic Peptide               | Nppb              | Rat     | QT00183225 | Rn_Nppb_1_SG QuantiTect Primer Assay       |
| Natriuretic peptide receptor 1           | Npr1              | Rat     | QT00178339 | Rn_Npr1_1_SG QuantiTect Primer Assay       |
| Natriuretic peptide receptor 2           | Npr2              | Rat     | QT00187432 | Rn_Npr2_1_SG QuantiTect Primer Assay       |
| Collagen type 1 alpha 1                  | Col1a1            | Rat     | QT01081059 | Rn_Col1a1_1_SG QuantiTect Primer Assay     |
| Transforming growth factor beta          | Tgfb              | Rat     | QT00187796 | Rn_Tgfb1_1_SG QuantiTect Primer Assay      |
| Fibronectin 1                            | Fn1               | Rat     | QT00179333 | Rn_Fn1_1_SG QuantiTect Primer Assay        |
| Tissue inhibitor metalloprotease 1       | Timp1             | Rat     | QT00185304 | Rn_Timp1_1_SG QuantiTect Primer Assay      |
| Glyceraldehyde 3-phosphate dehydrogenase | GAPDH             | Rat     | QT00199633 | Rn_Gapd_1_SG QuantiTect Primer Assay       |
| Alpha cardiac actin 1                    | Actc1             | Rat     | QT01081185 | Rn_Actc1_1_SG QuantiTect Primer Assay      |
| Tropomyosin 1                            | Tpm1              | Rat     | QT00194264 | Rn_Tpm1_1_SG QuantiTect Primer Assay       |
| Transthyretin                            | Ttr1              | Rat     | QT01081304 | Rn_Ttr_1_SG QuantiTect Primer Assay        |
| Myosin heavy chain 7                     | Myh7              | Rat     | QT00189504 | Rn_Myh7_1_SG QuantiTect Primer Assay       |
| Beta Actin                               | Actb              | Rat     | QT00193473 | Rn_Actb_1_SG QuantiTect Primer Assay       |
| Vascular endothelial growth factor       | VegF              | Rat     | QT00198954 | Rn_RGD:619991_1_SG QuantiTect Primer Assay |
| Jagged 1                                 | Jag1              | Rat     | QT00193424 | Rn_Jag1_1_SG QuantiTect Primer Assay       |
| Apolipoprotein E1                        | Apoe1             | Rat     | QT00408373 | Rn_Apoe_1_SG QuantiTect Primer Assay       |
| Nephrosis 1                              | Nphs1             | Rat     | QT00189805 | Rn_Nphs1_1_SG QuantiTect Primer Assay      |
